# Supplementary material for: Characterization of the complete mitochondrial genome sequences of three Merulinidae corals and novel insights into the phylogenetics
Source: PeerJ. 2020 Jan 24;8:e8455. doi: 10.7717/peerj.8455 (PMC6984341; doi:10.7717/peerj.8455)
Supplement: Table S1 [file peerj-08-8455-s010.xlsx]

## Sheet: Sheet1
	Table S1. 96 species and their taxonomy of series corals for the phylogenetic tree
	No.	ID	Species	Order	Family	Genus
	1	KM051016	Agaricia fragilis	Scleractinia	Agariciidae	Agaricia
	2	NC_008160	Agaricia humilis
	3	NC_008165	Pavona clavus			Pavona
	4	NC_026527	Pavona decussata
	5	NC_029696	Galaxea fascicularis		Euphylliidae	Galaxea
	6	NC_015641	Fimbriaphyllia ancora			Fimbriaphyllia
	7	NC_003522	Acropora tenuis		Acroporidae	Acropora
	8	NC_022829	Acropora yongei
	9	LC201816	Acropora austera
	10	LC201828	Acropora grandis
	11	LC201833	Acropora intermedia
	12	LC201849	Acropora awi
	13	NC_022830	Acropora digitifera
	14	NC_022823	Acropora humilis
	15	NC_022824	Acropora muricata
	16	NC_022827	Acropora aspera
	17	NC_022828	Acropora florida
	18	NC_022826	Acropora hyacinthus
	19	LC201817	Acropora cytherea
	20	LC201815	Acropora acuminata
	21	NC_022825	Acropora horrida
	22	LC201842	Acropora microphthalma deeper-morph
	23	NC_029251	Acropora aculeus
	24	NC_022832	Acropora divaricata
	25	LC201843	Acropora microphthalma
	26	NC_022831	Acropora nasuta
	27	MH141598	Acropora valida
	28	LC201847	Acropora selago
	29	KY094483	Acropora pruinosa
	30	LC201820	Acropora echinata
	31	NC_022833	Acropora robusta
	32	LC201813	Acropora carduus
	33	NC_024091	Isopora palifera			Isopora
	34	NC_024089	Isopora togianensis
	35	NC_006902	Montipora cactus			Montipora
	36	KY094487	Montipora peltiformis
	37	NC_037359	Montipora aequituberculata
	38	NC_006898	Anacropora matthai			Anacropora
	39	KJ634271	Alveopora sp.			Alveopora
	40	NC_024090	Astreopora explanata			Astreopora
	41	NC_024092	Astreopora myriophthalma
	42	NC_008167	Siderastrea radians		Siderastreidae	Siderastrea
	43	NC_026530	Pseudosiderastrea formosa			Pseudosiderastrea
	44	NC_026531	Pseudosiderastrea tayami
	45	NC_024671	Turbinaria peltata		Dendrophylliidae	Turbinaria
	46	NC_030352	Tubastraea tagusensis			Tubastraea
	47	KX024566	Tubastraea coccinea
	48	NC_026026	Dendrophyllia cribrosa			Dendrophyllia
	49	NC_027590	Dendrophyllia arbuscula
	50	NC_015643	Goniopora columna		Poritidae	Goniopora
	51	NC_015644	Porites okinawensis			Porites
	52	NC_030186	Porites lobata
	53	KU159432	Porites lutea
	54	NC_024182	Porites panamensis
	55	NC_008166	Porites porites
	56	NC_037434	Porites fontanesii
	57	NC_027526	Porites rus
	58	KU956960	Porites sverdrupi
	59	NC_037435	Porites harrisoni
	60	NC_015640	Fungiacyathus stephanus		Fungiacyathidae	Fungiacyathus
	61	NC_008162	Colpophyllia natans		Mussidae	Colpophyllia
	62	NC_008163	Mussa angulosa			Mussa
	63	NC_035879	Favites abdita		Merulinidae	Favites
	64	NC_034916	Favites pentagona
	65	NC_020049	Platygyra carnosa			Platygyra
	66	MH086217	Hydnophora exesa			Hydnophora
	67	MH119077	Dipsastraea rotumana			Dipsastraea
	68	KY094484	Cyphastrea serailia			Cyphastrea
	69	NC_007224	Orbicella annularis			Orbicella
	70	NC_007226	Orbicella faveolata
	71	NC_007225	Orbicella franksi
	72	FO904931	Sclerophyllia maxima		Lobophylliidae	Sclerophyllia
	73	MG792550	Echinophyllia aspera			Echinophyllia
	74	MH025639	Plesiastrea versipora		Plesiastreidae	Plesiastrea
	75	NC_008161	Astrangia poculata		Rhizangiidae	Astrangia
	76	NC_015642	Polycyathus sp.		Caryophylliidae	Polycyathus
	77	NC_018364	Madrepora oculata		Oculinidae	Madrepora
	78	NC_010244	Seriatopora hystrix		Pocilloporidae	Seriatopora
	79	NC_010245	Seriatopora caliendrum
	80	NC_011160	Madracis myriaster			Madracis
	81	EU400213	Pocillopora damicornis			Pocillopora
	82	NC_009798	Pocillopora grandis
	83	NC_011162	Stylophora pistillata			Stylophora
	84	NC_034275	Desmophyllum dianthus		Caryophylliidae	Desmophyllum
	85	NC_015143	Desmophyllum pertusum
	86	NC_025472	Solenosmilia variabilis			Solenosmilia
	87	NC027106	Ricordea yuma	Corallimorpharia	Ricordeidae	Ricordea
	88	NC008159	Ricordea florida
	89	NC027102	Corynactis californica		Corallimorphidae	Corynactis
	90	KP938437	Pseudocorynactis sp.			Pseudocorynactis
	91	NC027104	Rhodactis mussoides		Discosomatidae	Rhodactis
	92	NC027103	Rhodactis indosinensis
	93	NC008158	Rhodactis sp.
	94	NC027101	Amplexidiscus fenestrafer			Amplexidiscus
	95	NC027100	Discosoma nummiforme			Discosoma
	96	NC008071	Discosoma sp.
