# Supplementary material for: Characterization of the complete mitochondrial genome sequences of three Merulinidae corals and novel insights into the phylogenetics
Source: PeerJ. 2020 Jan 24;8:e8455. doi: 10.7717/peerj.8455 (PMC6984341; doi:10.7717/peerj.8455)
Supplement: Table S2 [file peerj-08-8455-s011.xlsx]

## Sheet: Sheet1
	Table S2. A best-fitting model matrix for 13 PCGs
	No.	Genes	Species
	1	ATP6	GTR+I+G
	2	ATP8	TIM3+I+G
	3	COI	GTR+I+G
	4	COII	TIM3+I+G
	5	COIII	GTR+I+G
	6	Cyt b	GTR+I+G
	7	ND1	GTR+I+G
	8	ND2	TVM+I+G
	9	ND3	TVM+G
	10	ND4	GTR+I+G
	11	ND4L	GTR+I+G
	12	ND5	GTR+I+G
	13	ND6	GTR+I+G
